# Supplementary material for: Institutional Trend in Device Selection for Transcatheter PDA Closure in Premature Infants
Source: PubMed Central journal article supplement (PMC9587941; doi:10.1007/s00246-022-02903-2), 2022-04-16
Supplement: 246_2022_2903_MOESM2_ESM.pdf [file 246_2022_2903_MOESM2_ESM.pdf]

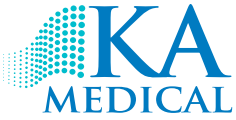

## US Customer Set-up and Agreement

| ENTITY INFORMATION                                                       |       |             |         |                                                                                                                                                                                                                                                                                                     |       |             |         |
|--------------------------------------------------------------------------|-------|-------------|---------|-----------------------------------------------------------------------------------------------------------------------------------------------------------------------------------------------------------------------------------------------------------------------------------------------------|-------|-------------|---------|
| Exact Legal Name of Entity:                                              |       |             |         |                                                                                                                                                                                                                                                                                                     |       |             |         |
| List any other Trade Names, DBA's:                                       |       |             |         |                                                                                                                                                                                                                                                                                                     |       |             |         |
| <b>Customer Address</b>                                                  |       |             |         | <b>Delivery Address</b> <input type="checkbox"/> Same as Customer Address                                                                                                                                                                                                                           |       |             |         |
| Street Address                                                           |       |             |         | Street Address                                                                                                                                                                                                                                                                                      |       |             |         |
| Address Line 2/Department                                                |       |             |         | Address Line 2/Department                                                                                                                                                                                                                                                                           |       |             |         |
| City                                                                     | State | Postal Code | Country | City                                                                                                                                                                                                                                                                                                | State | Postal Code | Country |
| <b>Invoice Address</b> <input type="checkbox"/> Same as Customer Address |       |             |         | Type of Business: <input type="checkbox"/> Hospital <input type="checkbox"/> Manufacturer<br><input type="checkbox"/> Surgery Center <input type="checkbox"/> Distributor<br><input type="checkbox"/> Contractor <input type="checkbox"/> Dealer<br><input type="checkbox"/> Other (Explain): _____ |       |             |         |
| Street Address                                                           |       |             |         |                                                                                                                                                                                                                                                                                                     |       |             |         |
| Address Line 2/Department                                                |       |             |         |                                                                                                                                                                                                                                                                                                     |       |             |         |
| City                                                                     | State | Postal Code | Country |                                                                                                                                                                                                                                                                                                     |       |             |         |
| Federal Tax ID No. (if different from VAT No.)                           |       |             | VAT No. | Local Currency Credit Limit Requested:                                                                                                                                                                                                                                                              |       |             |         |

| ENTITY REPRESENTATIVES INFORMATION           |      |                                        |      |
|----------------------------------------------|------|----------------------------------------|------|
| <b>Primary Physician Contact Information</b> |      | <b>Accounts Payable Contact Person</b> |      |
| Name:                                        |      | Name:                                  |      |
| Phone:                                       | Fax: | Phone:                                 | Fax: |
| Email:                                       |      | Email:                                 |      |

| CUSTOMER AUTHORIZATIONS AND SIGNATURE                                                                                                                                                                                                                                                                                                                                                                                                                                                                                                                                                                                                        |              |
|----------------------------------------------------------------------------------------------------------------------------------------------------------------------------------------------------------------------------------------------------------------------------------------------------------------------------------------------------------------------------------------------------------------------------------------------------------------------------------------------------------------------------------------------------------------------------------------------------------------------------------------------|--------------|
| <p>KA Medical, LLC's payment terms are Net 30 Days from date of invoice. All invoices are due on the due date. If any sections of this form are not completed, order processing, credit consideration and allocation may be adversely affected.</p> <p>The entity representative's signature, on behalf of the debtor, attests financial responsibility, ability, and willingness to pay in accordance with the above standard payment terms. Applicant, and the officer or other representative signing on behalf of applicant, hereby certify that they have carefully reviewed this form and it is warranted to be true and complete.</p> |              |
| Authorized Representatives Signature: _____                                                                                                                                                                                                                                                                                                                                                                                                                                                                                                                                                                                                  | Date: _____  |
| Print Name: _____                                                                                                                                                                                                                                                                                                                                                                                                                                                                                                                                                                                                                            | Title: _____ |

**Return completed form to [info@ka-medical.com](mailto:info@ka-medical.com)**

| FOR KA MEDICAL USE ONLY:                                                                  |                             |
|-------------------------------------------------------------------------------------------|-----------------------------|
| Customer No.                                                                              | Authorized Credit Limit:    |
| KA Medical Representatives Signature: _____ Date: _____<br>Print Name: _____ Title: _____ |                             |
| Add to customer master:                                                                   | Initials: _____ Date: _____ |

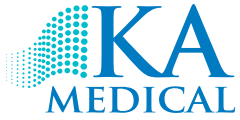

## US Order Instructions and Price List

### ORDER INSTRUCTIONS

To place an order or request a quote please  
contact: Email: info@ka-medical.com  
Phone: 651-262-2810

### PRICE LIST

| Order Number | Description                              | Price (each) |
|--------------|------------------------------------------|--------------|
| 90000        | Micro Plug Set, 3mm Plug, 125cm Catheter | \$1400.00    |
| 90001        | Micro Plug Set, 4mm Plug, 125cm Catheter | \$1400.00    |
| 90002        | Micro Plug Set, 5mm Plug, 125cm Catheter | \$1400.00    |
| 90003        | Micro Plug Set, 6mm Plug, 125cm Catheter | \$1400.00    |

Note: Price does not include shipping and handling.

Approved for ordering, returned to customer: Init: \_\_\_\_\_ Date: \_\_\_\_\_
