# Supplementary material for: Institutional Trend in Device Selection for Transcatheter PDA Closure in Premature Infants
Source: PubMed Central journal article supplement (PMC9587941; doi:10.1007/s00246-022-02903-2), 2022-04-16
Supplement: 246_2022_2903_MOESM3_ESM.pdf [file 246_2022_2903_MOESM3_ESM.pdf]

**EXHIBIT A**

**PRODUCT DESCRIPTION AND PRICING**

| <b>Model Number</b> | <b>Model Description</b> | <b>Unit of Measure</b> | <b>Customer Price</b> |
|---------------------|--------------------------|------------------------|-----------------------|
| 9-PDAP-03-02-L      | AMPLATZER Piccolo 3-2mm  | EA                     | \$9,680.00            |
| 9-PDAP-03-04-L      | AMPLATZER Piccolo 3-4mm  | EA                     | \$9,680.00            |
| 9-PDAP-03-06-L      | AMPLATZER Piccolo 3-6mm  | EA                     | \$9,680.00            |
| 9-PDAP-04-02-L      | AMPLATZER Piccolo 4-2mm  | EA                     | \$9,680.00            |
| 9-PDAP-04-04-L      | AMPLATZER Piccolo 4-4mm  | EA                     | \$9,680.00            |
| 9-PDAP-04-06-L      | AMPLATZER Piccolo 4-6mm  | EA                     | \$9,680.00            |
| 9-PDAP-05-02-L      | AMPLATZER Piccolo 5-2mm  | EA                     | \$9,680.00            |
| 9-PDAP-05-04-L      | AMPLATZER Piccolo 5-4mm  | EA                     | \$9,680.00            |
| 9-PDAP-05-06-L      | AMPLATZER Piccolo 5-6mm  | EA                     | \$9,680.00            |
